# Supplementary material for: Abundances, emissions, and loss processes of the long-lived and potent greenhouse gas octafluorooxolane (octafluorotetrahydrofuran, c -C 4 F 8 O) in the atmosphere
Source: Copernicus journal article supplement (doi:10.5194/acp-19-3481-2019), 2019-03-20
Supplement: Supplementary file 2 [file acp-19-3481-2019-supplement.zip]

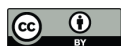

## *Supplement of*

# **Abundances, emissions, and loss processes of the long-lived and potent greenhouse gas octafluorooxolane (octafluorotetrahydrofuran, $c\text{-C}_4\text{F}_8\text{O}$ ) in the atmosphere**

**Martin K. Vollmer et al.**

*Correspondence to:* Martin K. Vollmer ([martin.vollmer@empa.ch](mailto:martin.vollmer@empa.ch))

- [acp-19-3481-2019-supplement-title-page.pdf](#)
- Supp
  - [VollmerTableS1-IR\\_Spectrum.txt](#)
  - [VollmerTableS2-O1D\\_Kinetics.txt](#)
  - [VollmerTableS3-AirSamplesMoleFractions.txt](#)
  - [VollmerTableS4-CSIRO-Inversion.csv](#)
  - [vollmer\\_supp\\_rev.pdf](#)

The copyright of individual parts of the supplement might differ from the CC BY 4.0 License.
